# Supplementary material for: CO2-Based micro-respirometry for measuring bacterial load under aerobic and anaerobic conditions
Source: Royal Society of Chemistry journal article supplement (doi:10.1039/d4an01016g), 2024-01-01
Supplement: d4an01016g1.pdf [file d4an01016g1.pdf]

# Electronic supplementary material (ESI)

## **CO<sub>2</sub>-based micro-respirometry for measuring bacterial load under aerobic and anaerobic conditions**

L. McDonnell, D. Yusufu, and A. Mills\*

School of Chemistry and Chemical Engineering, Queens University Belfast, Stranmillis Road,  
Belfast, BT9 5AG, UK

## **S1. Growth and plate counting medium**

*Preparation of the liquid and solid growth media for use with E. coli.*

The liquid growth medium used in this work was a nutrient-rich broth (NB), prepared by adding 5 g casein yeast peptone, 10 g glucose and 5 g sodium chloride to a 1 L borosilicate glass reagent bottle containing 1 L water. Once all the ingredients were fully dissolved, the growth medium was sterilized by autoclaving at 121 °C for 15 minutes. The solid agar growth medium used for the plate count method (PCM) was prepared by adding 10 g agar to 1 L of the liquid growth medium, autoclaved at 121 °C for 15 min, and then allowed to cool to 52 °C in air. Then, the hot liquid agar was poured into the large Petri dishes used for the aerobic PCM.<sup>1</sup> Subsequently, the plates were allowed to cool to room temperature, and then refrigerated until needed.

### **References**

1. ISO 4833–2, ISO 4833–2:2013, Microbiology of the food chain- horizontal method for the enumeration of microorganisms- part 2: colony count at 30 °C by the surface plating technique, International Organization for Standardization, Geneva, 2013.

## S2 Preparation of stock dispersion of *E. coli*

### *Preparation of E. coli stock cultures*

To produce a primary stock culture, a KWIK-STIK containing a pure population of *E. coli* was gently swabbed across the surface of the solid agar in a 90 x 15 mm Petri dish.<sup>1</sup> The inoculated culture plate was immediately incubated at 30 °C overnight, after which there was visible growth of single colonies of bacteria; subsequently, the plate was wrapped in Parafilm® and refrigerated until needed.

The process of making an overnight stock of a liquid culture of *E. coli* was as follows: a single colony of the bacterium was taken from the primary culture plate using a sterile inoculating loop and suspended in 10 mL of NB in a 15 mL Falcon® tube, which was then incubated overnight at 30 °C. The loading of the resulting overnight culture, *ca.* 10<sup>8</sup> CFU/mL, was confirmed using PCM.<sup>2</sup> Serial 1-in-10 dilutions of the overnight bacterial culture in NB were used to produce suspensions of initial inoculum concentrations of *ca.* 10<sup>8</sup>-10<sup>1</sup> CFU/mL of the bacteria; these dilutions were prepared fresh on the day of use, and 1 mL samples of each inoculum in 9 mL NB were used in creating a calibration curve for the %CO<sub>2</sub>-μR system. In generating the calibration curve for *E. coli* under *anaerobic* conditions, 50 mg sodium sulfite were added to the Falcon® tube containing 1 mL inoculum/ 9 mL NB before incubation.

Aerobic PCM was carried out by inoculating 3 agar plates with 0.1 mL of the assumed 'ca. 10<sup>3</sup> CFU/mL' dilution, which was spread across the plate with an L-spreader; the plates were incubated at 30 °C overnight. After this period, there was visible growth of single colonies of bacteria on each plate, which could then be counted, an average of the 3 plate counts taken, and the results used to estimate the microbial load of the original overnight culture stock.<sup>2</sup>

### References

1. Microbiologics KWIK-STIK™, <https://www.microbiologics.com/item-type/Product/product-format/KWIK-STIK-2-Pack,KWIK-STIK-6-Pack>, (accessed July 2024).
2. ISO 4833–2, ISO 4833–2:2013, Microbiology of the food chain- horizontal method for the enumeration of microorganisms- part 2: colony count at 30 °C by the surface plating technique, International Organization for Standardization, Geneva, 2013

### **S3. Falcon™ tube ‘bioreactor’ with O<sub>2</sub> and CO<sub>2</sub> sensors**

A schematic illustration of the typical %CO<sub>2</sub>-μR ‘bioreactor’ used in this work is given in Fig. S1 and comprised a 15 mL Falcon® tube with a luminescence-based O<sub>2</sub> indicator (Oculer Ltd., Tipperary, Ireland) set in its base. To this was added a 3D printed XB/LDPE %CO<sub>2</sub> indicator, printed on Tyvek™ and secured in place using surgical tape. Typically, this Falcon® tube ‘bioreactor’ was filled with 9 mL of the relevant growth medium and 1 ml of the inoculum under test, shaken and then incubated (in a Heratherm™ Compact Microbiological Incubator (Thermo Fisher Scientific, Massachusetts, USA) at 30 °C over time, *t*, during which the apparent absorbance, *A*’, of the XB/LDPE %CO<sub>2</sub> indicator, and the lifetime of the luminescent O<sub>2</sub> indicator were monitored simultaneously.

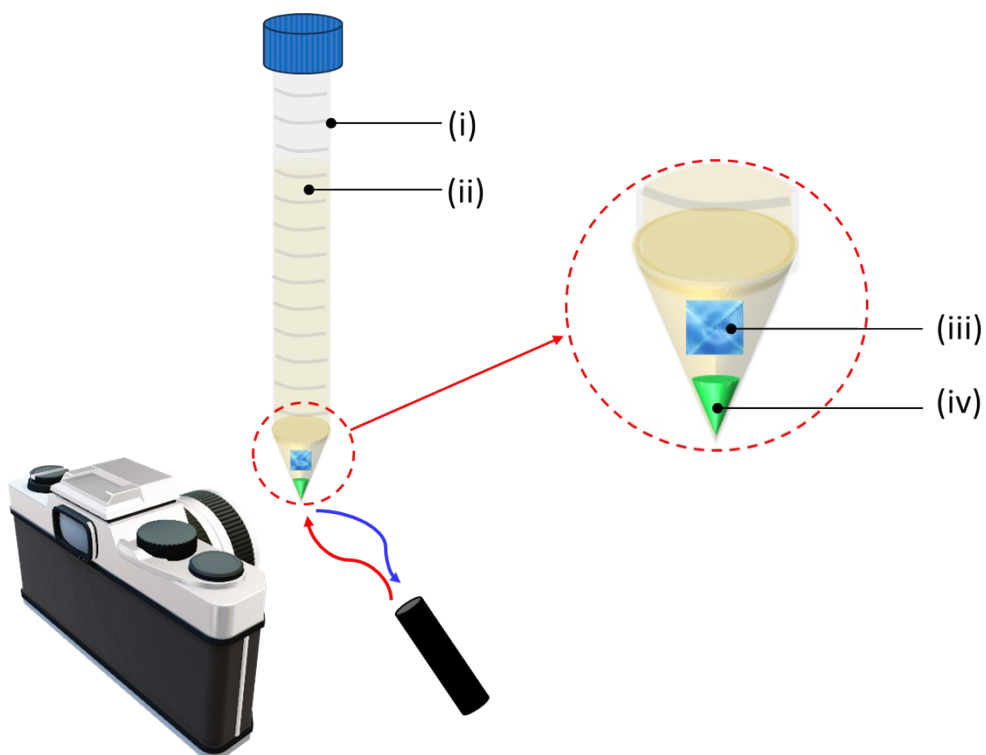

(a)

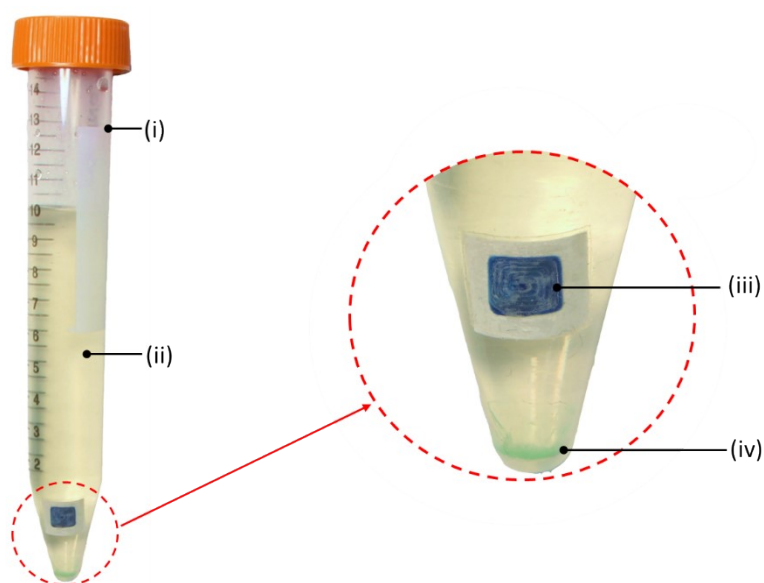

(b)

**Fig S1.** (a) Schematic and photographic images of the typical ‘bioreactor’ used in this work, comprising (i) 15 mL a Falcon™ tube, (ii) growth medium (9 mL) plus inoculum (1 mL), (iii) a 3D-printed, colourimetric XB/LDPE CO<sub>2</sub> indicator, and (iv) luminescence based O<sub>2</sub> indicator beads. The apparent absorbance,  $A'$ , of the CO<sub>2</sub> indicator, and the lifetime,  $\tau$ , of the O<sub>2</sub> indicator were monitored simultaneously using digital photography and a fibre-optic O<sub>2</sub> monitor, represented by the camera and measuring probe showing the excitation (red) and detected luminescence emission (blue), as illustrated in (a).

#### S4 Response and recovery time of the XB/LDPE indicator

A 3D printed xylenol blue (XB) CO<sub>2</sub> indicator, printed on Tyvek®, was sellotaped on the inside of a 1 cm cuvette, filled with nutrient broth. The cuvette was placed inside an incubator (Heratherm™ Compact Microbiological Incubator) set to 30 °C and alternating gas streams of 5 % CO<sub>2</sub> and air and were sparged through the cuvette. The colour change of the indicator was monitored photographically, and from the photographic images of the indicator, values of the apparent absorbance,  $A'$ , were calculated as a function of time. The results of this work are illustrated in Fig. S2.

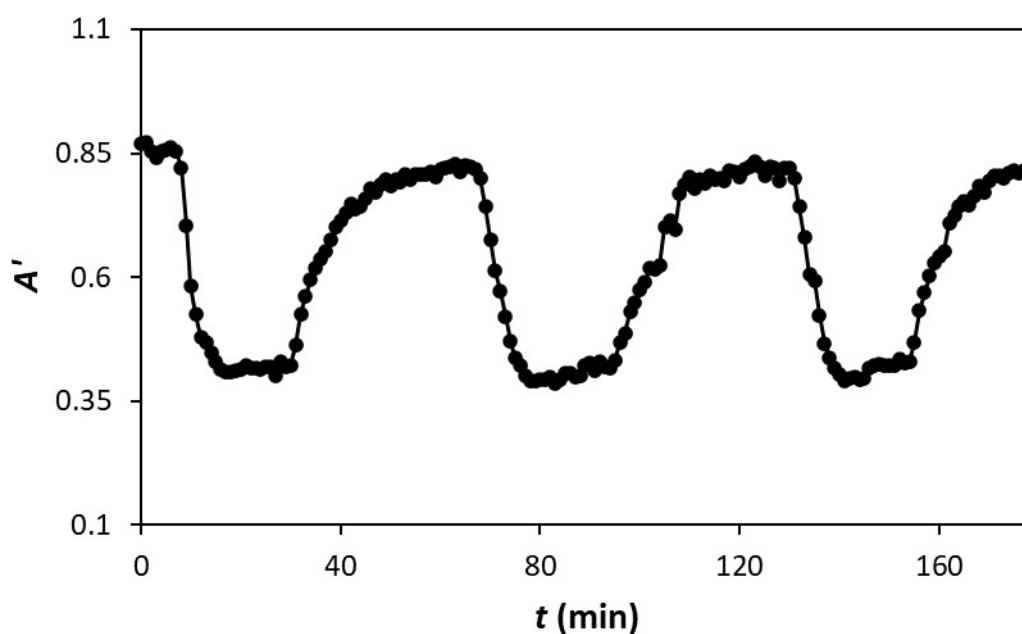

**Fig. S2.** Response and recovery spectra of the 3D printed XB CO<sub>2</sub> indicator in nutrient broth, sparged with an alternating stream of 5% CO<sub>2</sub> and air at 30°C revealing a 90% response time = 8.0 min and 90% recovery time = 14 min.

## S5. Reproducibility of the 3D printed CO<sub>2</sub> indicator

The reusable nature of the 3D printed XB CO<sub>2</sub> indicator used in %CO<sub>2</sub>- $\mu$ R was demonstrated by recording the  $A'$  vs  $t$  profiles for 10 otherwise identical %CO<sub>2</sub>- $\mu$ R runs using 10 different 3D printed XB/LDPE CO<sub>2</sub> indicators in NB inoculated with 10<sup>4</sup> CFU/mL of *E. coli*. The results of this work are illustrated in Fig. S2 and reveal an average TT value of 7.43  $\pm$  0.18 h.

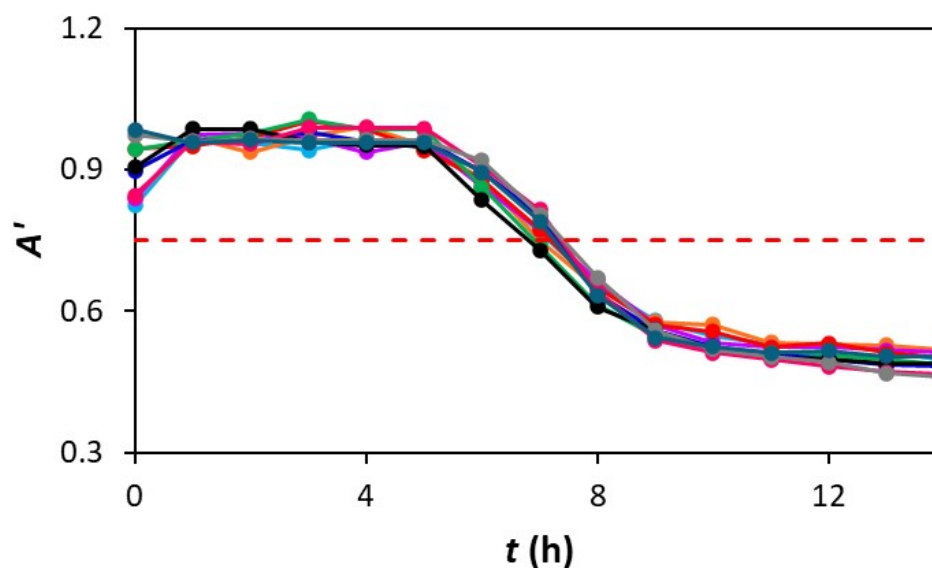

**Fig. S3.** Apparent absorbance,  $A'$ , vs incubation time,  $t$ , profiles for 10 different 3D printed XB CO<sub>2</sub> indicators exposed to a 10<sup>4</sup> CFU/mL culture of *E. coli*, recorded at 30 °C. This data reveals an average TT value of 7.43  $\pm$  0.18 h.

**S6. %CO<sub>2</sub>-μR results, using *E. coli*, under aerobic and anaerobic conditions**

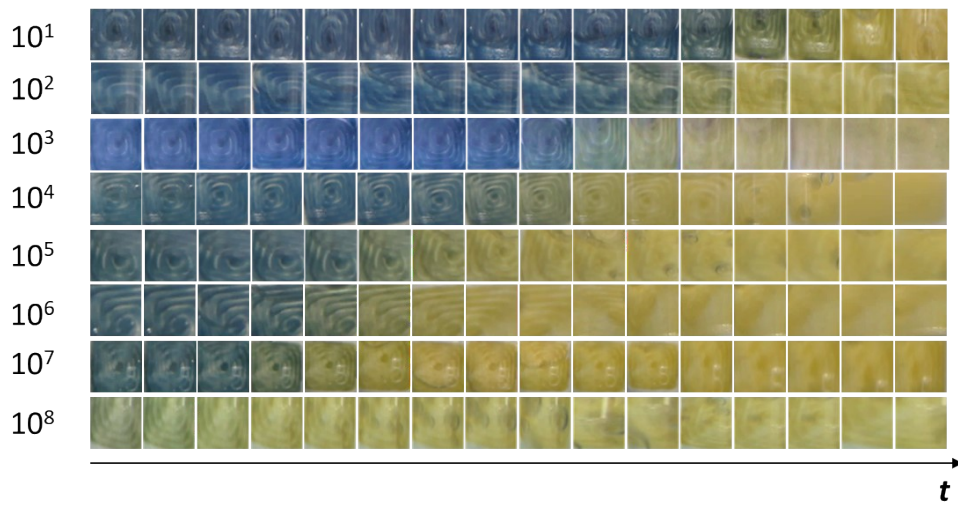

**Fig. S4.** Photographs of the XB/LDPE %CO<sub>2</sub> indicator in inoculated NB recorded as a function of incubation time,  $t$ , at 30 °C, every hour for 15 h, with initial inoculums (1 mL in 9 mL of NB) of  $10^1$ – $10^8$  CFU/mL of *E. coli*, respectively, recorded under *aerobic* conditions.

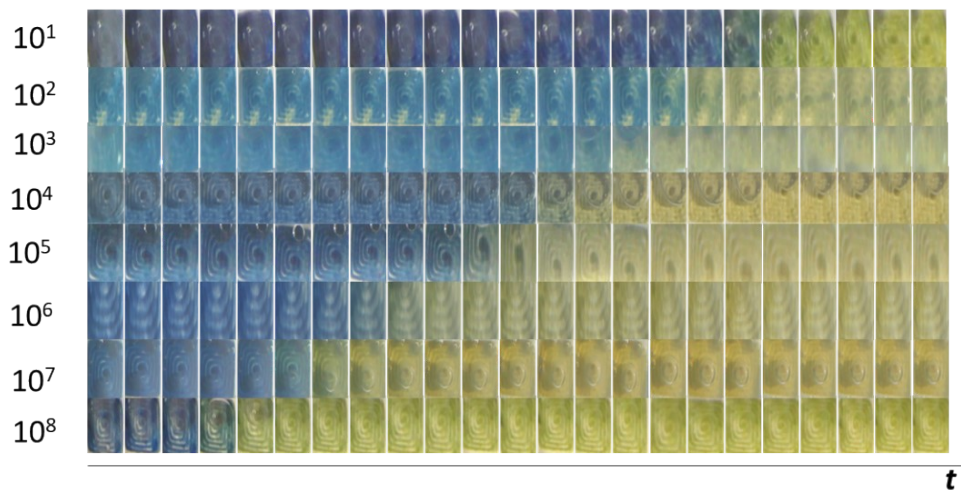

**Fig. S5.** Photographs of the XB/LDPE %CO<sub>2</sub> indicator in inoculated growth medium recorded as a function of incubation time,  $t$ , at 30 °C, every hour for 22 h, with initial inoculums (1 mL in 9 mL of NB) of  $10^1$ – $10^8$  CFU/mL of *E. coli*, respectively, recorded under *anaerobic* conditions.
